# Supplementary material for: Breastfeeding duration and subsequent risk of mortality among US women: A prospective cohort study
Source: PubMed Central journal article supplement — eClinicalMedicine. 2022 Oct 13;54:101693. doi: 10.1016/j.eclinm.2022.101693 (PMC9574410; doi:10.1016/j.eclinm.2022.101693), 2022-10-13
Supplement: mmc1.pdf [file mmc1.pdf]

## Supplemental Appendix

### **Breastfeeding duration and subsequent risk of mortality among US women: a prospective cohort study**

Yi-Xin Wang, Mariel Arvizu, Janet W. Rich-Edwards, JoAnn E. Manson, Liang Wang, Stacey A. Missmer, and Jorge E. Chavarro

| Contents                                                                                                                                                                                                                                                                                                                                                                          | Pages |
|-----------------------------------------------------------------------------------------------------------------------------------------------------------------------------------------------------------------------------------------------------------------------------------------------------------------------------------------------------------------------------------|-------|
| Appendix Table 1. The baseline demographic characteristics and prepregnancy lifestyle factors between included women and those excluded due to missing data on breastfeeding duration.                                                                                                                                                                                            | 2     |
| Appendix Table 2. Categories of causes of death and number of reported cases per cause [NHS (1986-2016) and NHS II (1989-2019)].                                                                                                                                                                                                                                                  | 3     |
| Appendix Table 3. Pooled hazard ratios (HR) (95% confidence intervals (CI)) for the risk of cause-specific cancer and non-CVD/cancer mortality, according to lifetime total breastfeeding duration among 166,708 women from the NHS (1986-2016) and NHS II (1989-2019).                                                                                                           | 4     |
| Appendix Table 4. Pooled hazard ratios (HR) (95% confidence intervals (CI)) of all-cause mortality according to the average duration of total breastfeeding (per parity) among 166,708 women from the NHS (1986-2016) and NHS II (1989-2019).                                                                                                                                     | 6     |
| Appendix Table 5. Sensitivity analysis of the pooled hazard ratios (HR) (95% confidence intervals (CI)) of cause-specific mortality according to lifetime total breastfeeding duration among 166,708 women from the NHS (1986-2016) and NHS II (1989-2019), with additional adjustment for time-varying parity.                                                                   | 7     |
| Appendix Table 6. Sensitivity analysis of the pooled hazard ratios (HR) (95% confidence intervals (CI)) of cause-specific mortality according to lifetime total breastfeeding duration among 166,708 women from the NHS (1986-2016) and NHS II (1989-2019), with additional adjustment for the state of birth.                                                                    | 8     |
| Appendix Table 7. Sensitivity analysis of the pooled hazard ratios (HR) (95% confidence intervals (CI)) of cause-specific mortality according to lifetime total breastfeeding duration among 166,708 women from the NHS (1986-2016) and NHS II (1989-2019), by stratifying the analyses jointly by calendar years and participants' own age in months or less refined age groups. | 9     |
| Appendix Table 8. Sensitivity analysis of the association between lifetime total breastfeeding duration and average duration of total breastfeeding (per child) and all-cause mortality among 80,744 women from the NHS II (1989-2019), with additional adjustment for gestational diabetes and hypertensive disorders of pregnancy.                                              | 10    |
| Appendix Table 9. Hazard ratios (HR) (95% confidence intervals (CI)) of all-cause mortality according to lifetime total exclusive breastfeeding duration among 75,221 women from the NHS II (1989-2019).                                                                                                                                                                          | 11    |

**Appendix Table 1. The baseline demographic characteristics and prepregnancy lifestyle factors between included women and those excluded due to missing data on breastfeeding duration.**

| Characteristics <sup>a,b</sup>                                          | Included      | Excluded      |
|-------------------------------------------------------------------------|---------------|---------------|
| <b>The Nurses' Health Study (1986)</b>                                  |               |               |
| Number of women                                                         | 85,964        | 16,009        |
| Age (year), mean (SD)                                                   | 52.2 (7.1)    | 51.9 (7.4)    |
| Non-Hispanic White, %                                                   | 83,834 (97.5) | 15,027 (93.8) |
| Woman's own birth weight less than 2.5kg, %                             | 6306 (7.3)    | 441 (2.8)     |
| Oral contraceptive use during puberty, %                                | 5358 (6.2)    | 946 (6.1)     |
| Parity, mean (SD)                                                       | 3.2 (1.5)     | 3.1 (1.6)     |
| Age at first birth (year), mean (SD)                                    | 25.2 (3.7)    | 25.4 (5.1)    |
| Prepregnancy cigarette smoking, %                                       | 19,044 (22.1) | 5505 (34.6)   |
| Pre-pregnancy BMI (kg/m <sup>2</sup> ), mean (SD)                       | 25.3 (4.8)    | 24.5 (4.7)    |
| Pre-pregnancy diet quality (alternate healthy eating index), mean (SD)  | 50.2 (12.3)   | 37.6 (12.4)   |
| Pre-pregnancy alcohol intake (g/d), mean (SD)                           | 6.1 (10.6)    | 6.5 (11.1)    |
| Pre-pregnancy moderate to vigorous intensity exercise (h/wk), mean (SD) | 2.1 (3.3)     | 3.0 (2.4)     |
| <b>The Nurses' Health Study II (1989)</b>                               |               |               |
| Number of women                                                         | 80,744        | 10,677        |
| Age (year), mean (SD)                                                   | 34.3 (4.7)    | 34.6 (4.6)    |
| Non-Hispanic White, %                                                   | 75,792 (93.9) | 9116 (85.4)   |
| Woman's own birth weight less than 2.5kg, %                             | 5181 (6.4)    | 503 (4.7)     |
| Oral contraceptive use during puberty, %                                | 17,751 (22.0) | 2445 (23.3)   |
| Parity, mean (SD)                                                       | 1.8 (1.1)     | 2 (0.9)       |
| Age at first birth (year), mean (SD)                                    | 26.6 (4.8)    | 24.9 (4.2)    |
| Prepregnancy cigarette smoking, %                                       | 5622 (7.0)    | 1385 (12.9)   |
| Pre-pregnancy BMI (kg/m <sup>2</sup> ), mean (SD)                       | 23.9 (4.7)    | 24.6 (5.2)    |
| Pre-pregnancy diet quality (alternate healthy eating index), mean (SD)  | 47.4 (10.6)   | 46.5 (10.4)   |
| Pre-pregnancy alcohol intake (g/d), mean (SD)                           | 2.9 (5.7)     | 2.6 (5.3)     |
| Pre-pregnancy moderate to vigorous intensity exercise (h/wk), mean (SD) | 2.8 (4.8)     | 2.8 (5.0)     |

<sup>a</sup>Values are means (SD) or N (percentages); means (SD) and percentages of all variables except for age are age-standardised. <sup>b</sup>In NHS, a total of 176 (0.2%), 16951 (16.6%), and 12195 (12.0%) women had missing data on baseline BMI, diet (including alcohol intake), and physical activity, respectively; in NHS II, a total of 5360 (5.9%), 19866 (21.7%), 6762 (7.4%), and 1245 (1.4%) women had missing data on baseline BMI, diet (including alcohol intake), physical activity, and age at first birth, respectively.

**Appendix Table 2. Categories of causes of death and number of reported cases per cause [NHS (1986-2016) and NHS II (1989-2019)].**

| Causes of death                                                     | ICD-8 or 9 code  | N of death |        |
|---------------------------------------------------------------------|------------------|------------|--------|
|                                                                     |                  | NHS        | NHS II |
| Cancer                                                              | 140-207          | 8753       | 1127   |
| Breast cancer                                                       | 174              | 1226       | 375    |
| Malignant neoplasm of digestive organs and peritoneum               | 150-159          | 1913       | 183    |
| Malignant neoplasm of genito-urinary organs                         | 180-189          | 1278       | 166    |
| Malignant neoplasm of respiratory system                            | 160-163          | 2135       | 138    |
| Neoplasms of lymphatic and haematopoietic tissue                    | 200-207          | 977        | 95     |
| Malignant neoplasm of bone, connective tissue, and skin             | 170-174          | 196        | 51     |
| Malignant neoplasm of buccal cavity and pharynx                     | 140-149          | 93         | 8      |
| Malignant neoplasm of other and unspecified sites                   | 190-199          | 935        | 111    |
| Cardiovascular disease                                              | 390-459, 795     | 7517       | 192    |
| Other causes                                                        | 460-999          | 17,452     | 1593   |
| External causes (accidents, injury, and poisoning)                  | 800-950, 959-999 | 1131       | 149    |
| Senility and ill-defined diseases                                   | 790-794, 796     | 2389       | 107    |
| Suicide                                                             | 950-959          | 82         | 61     |
| Respiratory disease                                                 | 460-519          | 2795       | 59     |
| Diseases of gastro-intestinal system                                | 520-577          | 843        | 57     |
| Diseases of the nervous system and sense organs                     | 320-389          | 886        | 52     |
| Infectious and parasitic diseases                                   | 000-136          | 689        | 43     |
| Endocrine, nutritional and metabolic diseases or immunity disorders | 240-279          | 393        | 30     |
| Mental disorders                                                    | 290-315          | 4654       | 30     |
| Diseases of the musculoskeletal system and connective tissue        | 710-738          | 227        | 19     |
| Benign neoplasm                                                     | 208-239          | 122        | 6      |
| Diseases of genito-urinary system                                   | 580-629          | 531        | 11     |
| Diseases of the blood and blood-forming organs                      | 280-289          | 77         | 5      |
| Complications of pregnancy, childbirth, and the puerperium          | 630-676, 760-779 | 1          | 4      |
| Diseases of the skin and subcutaneous tissue                        | 680-709          | 7          | 0      |
| Congenital anomalies                                                | 740-759          | 11         | 9      |
| Symptoms referable to systems or organs                             | 780-789          | 14         | 1      |
| Uncertain                                                           | -                | 2600       | 950    |

ICD: International Classification of Diseases.

**Appendix Table 3. Pooled hazard ratios (HR) (95% confidence intervals (CI)) for the risk of cause-specific cancer and non-CVD/cancer mortality, according to lifetime total breastfeeding duration among 166,708 women from the NHS (1986-2016) and NHS II (1989-2019).**

| Cause-specific mortality                                       | Lifetime total breastfeeding duration |                   | P      |
|----------------------------------------------------------------|---------------------------------------|-------------------|--------|
|                                                                | ≤3 months                             | >3 months         |        |
| <b>Cancer</b>                                                  |                                       |                   |        |
| <b>Breast cancer</b>                                           |                                       |                   |        |
| Events, No.                                                    | 870                                   | 731               |        |
| HR (95% CI) <sup>a</sup>                                       | 1.00 [Reference]                      | 0.95 (0.85, 1.05) | 0.32   |
| <b>Malignant neoplasm of digestive organs and peritoneum</b>   |                                       |                   |        |
| Events, No.                                                    | 1277                                  | 819               |        |
| HR (95% CI) <sup>a</sup>                                       | 1.00 [Reference]                      | 0.94 (0.86, 1.02) | 0.15   |
| <b>Malignant neoplasm of genito-urinary organs</b>             |                                       |                   |        |
| Events, No.                                                    | 860                                   | 584               |        |
| HR (95% CI) <sup>a</sup>                                       | 1.00 [Reference]                      | 0.93 (0.83, 1.04) | 0.18   |
| <b>Malignant neoplasm of respiratory system</b>                |                                       |                   |        |
| Events, No.                                                    | 1491                                  | 782               |        |
| HR (95% CI) <sup>a</sup>                                       | 1.00 [Reference]                      | 0.91 (0.84, 1.00) | 0.044  |
| <b>Neoplasms of lymphatic and haematopoietic tissue</b>        |                                       |                   |        |
| Events, No.                                                    | 638                                   | 434               |        |
| HR (95% CI) <sup>a</sup>                                       | 1.00 [Reference]                      | 0.99 (0.87, 1.12) | 0.88   |
| <b>Malignant neoplasm of bone, connective tissue, and skin</b> |                                       |                   |        |
| Events, No.                                                    | 140                                   | 107               |        |
| HR (95% CI) <sup>a</sup>                                       | 1.00 [Reference]                      | 0.90 (0.69, 1.17) | 0.44   |
| <b>Malignant neoplasm of other and unspecified sites</b>       |                                       |                   |        |
| Events, No.                                                    | 605                                   | 441               |        |
| HR (95% CI) <sup>a</sup>                                       | 1.00 [Reference]                      | 1.05 (0.93, 1.20) | 0.42   |
| <b>Non-CVD/Non-cancer death</b>                                |                                       |                   |        |
| <b>External causes (accidents, injury, and poisoning)</b>      |                                       |                   |        |
| Events, No.                                                    | 779                                   | 501               |        |
| HR (95% CI) <sup>a</sup>                                       | 1.00 [Reference]                      | 0.92 (0.82, 1.03) | 0.15   |
| <b>Senility and ill-defined diseases</b>                       |                                       |                   |        |
| Events, No.                                                    | 1575                                  | 921               |        |
| HR (95% CI) <sup>a</sup>                                       | 1.00 [Reference]                      | 0.94 (0.87, 1.02) | 0.15   |
| <b>Suicide</b>                                                 |                                       |                   |        |
| Events, No.                                                    | 60                                    | 83                |        |
| HR (95% CI) <sup>a</sup>                                       | 1.00 [Reference]                      | 1.43 (1.00, 2.04) | 0.049  |
| <b>Respiratory disease</b>                                     |                                       |                   |        |
| Events, No.                                                    | 1890                                  | 964               |        |
| HR (95% CI) <sup>a</sup>                                       | 1.00 [Reference]                      | 0.93 (0.86, 1.01) | 0.087  |
| <b>Diseases of gastrointestinal system</b>                     |                                       |                   |        |
| Events, No.                                                    | 596                                   | 304               |        |
| HR (95% CI) <sup>a</sup>                                       | 1.00 [Reference]                      | 0.81 (0.70, 0.93) | 0.0037 |
| <b>Diseases of the nervous system and sense organs</b>         |                                       |                   |        |
| Events, No.                                                    | 543                                   | 395               |        |
| HR (95% CI) <sup>a</sup>                                       | 1.00 [Reference]                      | 1.11 (0.97, 1.27) | 0.11   |
| <b>Infectious and parasitic diseases</b>                       |                                       |                   |        |
| Events, No.                                                    | 462                                   | 270               |        |
| HR (95% CI) <sup>a</sup>                                       | 1.00 [Reference]                      | 0.91 (0.78, 1.06) | 0.21   |

|                                                                     |                  |                   |        |
|---------------------------------------------------------------------|------------------|-------------------|--------|
| Endocrine, nutritional and metabolic diseases or immunity disorders |                  |                   |        |
| Events, No.                                                         | 290              | 133               |        |
| HR (95% CI) <sup>a</sup>                                            | 1.00 [Reference] | 0.70 (0.56, 0.86) | 0.0010 |
| Mental disorders                                                    |                  |                   |        |
| Events, No.                                                         | 2935             | 1749              |        |
| HR (95% CI) <sup>a</sup>                                            | 1.00 [Reference] | 0.99 (0.93, 1.05) | 0.76   |

<sup>a</sup>Cox proportional hazards regression models were stratified jointly by participants' own age in years at the start of follow-up and calendar years of the current questionnaire cycle, with adjustment for race/ethnicity (non-Hispanic White; yes or no), age at first birth (<20, 20-24, 25-29, ≥30 years), woman's own birth weight (<5.5, 5.5-6.9, 7.0-8.4, 8.5-9.9, ≥10 lbs), oral contraceptive use during puberty (yes or no), infertility history (yes or no), woman's parents worked as professionals, managers, or executives during infancy (yes or no), woman's parents owned home during infancy (yes or no), maternal history of cancer (yes or no), parental history of CVD before age 60 years (yes or no), and time-varying pre-pregnancy smoking status (never smoker, former smoker: 1-14, ≥15 cigarettes/d, and current smoker: 1-14, 15-24, ≥25 cigarettes/d), alcohol drinking (0, 0.1-4.9, 5.0-14.9, 15.0-19.9, 20.0-29.9, or ≥30 g/d), exercise at moderate-to-high intensity (0, 0.01-1.0, 1.1-3.4, 3.5-5.9, or ≥6 h/week), and alternate healthy eating index (five categories), and body mass index (<21, 21-24.9, 25-29.9, 30-31.9, or ≥32 kg/m<sup>2</sup>).

**Appendix Table 4. Pooled hazard ratios (HR) (95% confidence intervals (CI)) of all-cause mortality according to the average duration of total breastfeeding (per parity) among 166,708 women from the NHS (1986-2016) and NHS II (1989-2019).**

| Average duration of total breastfeeding (per parity) | Death cases | Crude incidence per 1000 person-years | HRs (95% CIs)                    |                                    |                                    |
|------------------------------------------------------|-------------|---------------------------------------|----------------------------------|------------------------------------|------------------------------------|
|                                                      |             |                                       | Age-adjusted models <sup>a</sup> | Multivariable model 1 <sup>b</sup> | Multivariable model 2 <sup>c</sup> |
| <1                                                   | 21324       | 17.12                                 | 1.00 [Reference]                 | 1.00 [Reference]                   | 1.00 [Reference]                   |
| 1-3                                                  | 8560        | 14.89                                 | 0.91 (0.88, 0.93)                | 0.92 (0.89, 0.94)                  | 0.95 (0.93, 0.98)                  |
| 4-6                                                  | 3296        | 12.54                                 | 0.84 (0.81, 0.87)                | 0.85 (0.82, 0.89)                  | 0.92 (0.89, 0.96)                  |
| ≥7                                                   | 3454        | 10.81                                 | 0.85 (0.82, 0.88)                | 0.87 (0.84, 0.90)                  | 0.97 (0.93, 1.00)                  |
| p for linear trend                                   |             |                                       | <0.0001                          | <0.0001                            | 0.0005                             |

<sup>a</sup>Cox proportional hazard regression models were stratified jointly by participants' own age in years at the start of follow-up and calendar years of the current questionnaire cycle. <sup>b</sup>Multivariable Cox model 1 was further adjusted for race/ethnicity (non-Hispanic White; yes or no), age at first birth (<20, 20-24, 25-29, ≥30 years), woman's own birth weight (<5.5, 5.5-6.9, 7.0-8.4, 8.5-9.9, ≥10 lbs), oral contraceptive use during puberty (yes or no), infertility history (yes or no), woman's parents worked as professionals, managers, or executives during infancy (yes or no), woman's parents owned home during infancy (yes or no), maternal history of cancer (yes or no), and parental history of CVD before age 60 years (yes or no). <sup>c</sup>Multivariable Cox model 2 was further adjusted for time-varying pre-pregnancy smoking status (never smoker, former smoker: 1-14, ≥15 cigarettes/d, and current smoker: 1-14, 15-24, ≥25 cigarettes/d), alcohol drinking (0, 0.1-4.9, 5.0-14.9, 15.0-19.9, 20.0-29.9, or ≥30 g/d), exercise at moderate-to-high intensity (0, 0.01-1.0, 1.1-3.4, 3.5-5.9, or ≥6 h/week), and alternate healthy eating index (five categories), and body mass index (<21, 21-24.9, 25-29.9, 30-31.9, or ≥32 kg/m<sup>2</sup>). Tests for linear trends were evaluated using the Wald test on the continuous breastfeeding duration representing the median values of each category.

**Appendix Table 5. Sensitivity analysis of the pooled hazard ratios (HR) (95% confidence intervals (CI)) of cause-specific mortality according to lifetime total breastfeeding duration among 166,708 women from the NHS (1986-2016) and NHS II (1989-2019), with additional adjustment for time-varying parity.**

| Lifetime total breastfeeding duration | Death cases | Crude incidence per 1000 person-years | HRs (95% CIs) <sup>a</sup> |
|---------------------------------------|-------------|---------------------------------------|----------------------------|
| ≤3                                    | 5936        | 449                                   | 1.00 [Reference]           |
| 4-6                                   | 1137        | 394                                   | 0.95 (0.92, 0.98)          |
| 7-11                                  | 936         | 361                                   | 0.95 (0.92, 0.98)          |
| 12-23                                 | 1146        | 344                                   | 0.94 (0.91, 0.97)          |
| ≥24                                   | 725         | 345                                   | 0.95 (0.91, 1.00)          |
| p for linear trend                    |             |                                       | 0.0007                     |

<sup>a</sup>Cox proportional hazards regression models were stratified jointly by participants' own age in years at the start of follow-up and calendar years of the current questionnaire cycle, with adjustment for race/ethnicity (non-Hispanic White; yes or no), age at first birth (<20, 20-24, 25-29, ≥30 years), woman's own birth weight (<5.5, 5.5-6.9, 7.0-8.4, 8.5-9.9, ≥10 lbs), oral contraceptive use during puberty (yes or no), infertility history (yes or no), woman's parents worked as professionals, managers, or executives during infancy (yes or no), woman's parents owned home during infancy (yes or no), maternal history of cancer (yes or no), parental history of CVD before age 60 years (yes or no), as well as time-varying parity (continuous) and pre-pregnancy smoking status (never smoker, former smoker: 1-14, ≥15 cigarettes/d, and current smoker: 1-14, 15-24, ≥25 cigarettes/d), alcohol drinking (0, 0.1-4.9, 5.0-14.9, 15.0-19.9, 20.0-29.9, or ≥30 g/d), exercise at moderate-to-high intensity (0, 0.01-1.0, 1.1-3.4, 3.5-5.9, or ≥6 h/week), and alternate healthy eating index (five categories), and body mass index (<21, 21-24.9, 25-29.9, 30-31.9, or ≥32 kg/m<sup>2</sup>). Tests for linear trends were evaluated using the Wald test on the continuous breastfeeding duration representing the median values of each category.

**Appendix Table 6. Sensitivity analysis of the pooled hazard ratios (HR) (95% confidence intervals (CI)) of cause-specific mortality according to lifetime total breastfeeding duration among 166,708 women from the NHS (1986-2016) and NHS II (1989-2019), with additional adjustment for the state of birth.**

| Lifetime total breastfeeding duration | Death cases | Crude incidence per 1000 person-years | HRs (95% CIs) <sup>a</sup> |
|---------------------------------------|-------------|---------------------------------------|----------------------------|
| ≤3                                    | 5936        | 449                                   | 1.00 [Reference]           |
| 4-6                                   | 1137        | 394                                   | 0.94 (0.91, 0.97)          |
| 7-11                                  | 936         | 361                                   | 0.94 (0.90, 0.97)          |
| 12-23                                 | 1146        | 344                                   | 0.92 (0.89, 0.96)          |
| ≥24                                   | 725         | 345                                   | 0.92 (0.88, 0.96)          |
| p for linear trend                    |             |                                       | <0.0001                    |

<sup>a</sup>Cox proportional hazards regression models were stratified jointly by participants' own age in years at the start of follow-up and calendar years of the current questionnaire cycle, with adjustment for race/ethnicity (non-Hispanic White; yes or no), age at first birth (<20, 20-24, 25-29, ≥30 years), woman's own birth weight (<5.5, 5.5-6.9, 7.0-8.4, 8.5-9.9, ≥10 lbs), oral contraceptive use during puberty (yes or no), infertility history (yes or no), woman's parents worked as professionals, managers, or executives during infancy (yes or no), woman's parents owned home during infancy (yes or no), maternal history of cancer (yes or no), parental history of CVD before age 60 years (yes or no), tier of birth (North, Middle, South, outside of US), and time-varying pre-pregnancy smoking status (never smoker, former smoker: 1-14, ≥15 cigarettes/d, and current smoker: 1-14, 15-24, ≥25 cigarettes/d), alcohol drinking (0, 0.1-4.9, 5.0-14.9, 15.0-19.9, 20.0-29.9, or ≥30 g/d), exercise at moderate-to-high intensity (0, 0.01-1.0, 1.1-3.4, 3.5-5.9, or ≥6 h/week), and alternate healthy eating index (five categories), and body mass index (<21, 21-24.9, 25-29.9, 30-31.9, or ≥32 kg/m<sup>2</sup>). Tests for linear trends were evaluated using the Wald test on the continuous breastfeeding duration representing the median values of each category.



**Appendix Table 7. Sensitivity analysis of the pooled hazard ratios (HR) (95% confidence intervals (CI)) of cause-specific mortality according to lifetime total breastfeeding duration among 166,708 women from the NHS (1986-2016) and NHS II (1989-2019), by stratifying the analyses jointly by calendar years and participants' own age in months or broader age groups.<sup>a</sup>**

| Lifetime total breastfeeding duration                                                                                                                                         | Death cases | Crude incidence per 1000 person-years | HRs (95% CIs)     |
|-------------------------------------------------------------------------------------------------------------------------------------------------------------------------------|-------------|---------------------------------------|-------------------|
| The analyses were stratified jointly by participants' own age in months at the start of follow-up and calendar years of the current questionnaire cycle                       |             |                                       |                   |
| ≤3                                                                                                                                                                            | 5936        | 449                                   | 1.00 [Reference]  |
| 4-6                                                                                                                                                                           | 1137        | 394                                   | 0.95 (0.92, 0.98) |
| 7-11                                                                                                                                                                          | 936         | 361                                   | 0.94 (0.91, 0.98) |
| 12-23                                                                                                                                                                         | 1146        | 344                                   | 0.93 (0.90, 0.96) |
| ≥24                                                                                                                                                                           | 725         | 345                                   | 0.92 (0.88, 0.97) |
| p for linear trend                                                                                                                                                            |             |                                       | <0.0001           |
| The analyses were stratified jointly by participants' own age in years (5 years per category) at the start of follow-up and calendar years of the current questionnaire cycle |             |                                       |                   |
| ≤3                                                                                                                                                                            | 5936        | 449                                   | 1.00 [Reference]  |
| 4-6                                                                                                                                                                           | 1137        | 394                                   | 0.93 (0.91, 0.97) |
| 7-11                                                                                                                                                                          | 936         | 361                                   | 0.89 (0.86, 0.92) |
| 12-23                                                                                                                                                                         | 1146        | 344                                   | 0.86 (0.83, 0.89) |
| ≥24                                                                                                                                                                           | 725         | 345                                   | 0.84 (0.81, 0.88) |
| p for linear trend                                                                                                                                                            |             |                                       | <0.0001           |

<sup>a</sup>Cox proportional hazards regression models were stratified jointly by participants' own age (in years or months) at the start of follow-up and calendar years of the current questionnaire cycle, with adjustment for race/ethnicity (non-Hispanic White; yes or no), age at first birth (<20, 20-24, 25-29, ≥30 years), woman's own birth weight (<5.5, 5.5-6.9, 7.0-8.4, 8.5-9.9, ≥10 lbs), oral contraceptive use during puberty (yes or no), infertility history (yes or no), woman's parents worked as professionals, managers, or executives during infancy (yes or no), woman's parents owned home during infancy (yes or no), maternal history of cancer (yes or no), parental history of CVD before age 60 years (yes or no), gestational diabetes and hypertensive disorders of pregnancy (yes or no), and time-varying pre-pregnancy smoking status (never smoker, former smoker: 1-14, ≥15 cigarettes/d, and current smoker: 1-14, 15-24, ≥25 cigarettes/d), alcohol drinking (0, 0.1-4.9, 5.0-14.9, 15.0-19.9, 20.0-29.9, or ≥30 g/d), exercise at moderate-to-high intensity (0, 0.01-1.0, 1.1-3.4, 3.5-5.9, or ≥6 h/week), and alternate healthy eating index (five categories), and body mass index (<21, 21-24.9, 25-29.9, 30-31.9, or ≥32 kg/m<sup>2</sup>). Tests for linear trends were evaluated using the Wald test on the continuous breastfeeding duration representing the median values of each category.

**Appendix Table 8. Sensitivity analysis of the association between lifetime total breastfeeding duration and average duration of total breastfeeding (per child) and all-cause mortality among 80,744 women from the NHS II (1989-2019), with additional adjustment for gestational diabetes and hypertensive disorders of pregnancy.<sup>a</sup>**

| Lifetime total breastfeeding duration | Death cases | Crude incidence per 1000 person-years | HRs (95% CIs)     |
|---------------------------------------|-------------|---------------------------------------|-------------------|
| ≤3                                    | 969         | 1.60                                  | 1.00 [Reference]  |
| 4-6                                   | 373         | 1.43                                  | 1.05 (0.93, 1.19) |
| 7-11                                  | 478         | 1.24                                  | 0.98 (0.88, 1.10) |
| 12-23                                 | 582         | 1.06                                  | 0.87 (0.78, 0.96) |
| ≥24                                   | 510         | 1.03                                  | 0.87 (0.78, 0.97) |
| p for linear trend                    |             |                                       | 0.0013            |

<sup>a</sup>Cox proportional hazards regression models were stratified jointly by participants' own age in years at the start of follow-up and calendar years of the current questionnaire cycle, with adjustment for race/ethnicity (non-Hispanic White; yes or no), age at first birth (<20, 20-24, 25-29, ≥30 years), woman's own birth weight (<5.5, 5.5-6.9, 7.0-8.4, 8.5-9.9, ≥10 lbs), oral contraceptive use during puberty (yes or no), infertility history (yes or no), woman's parents worked as professionals, managers, or executives during infancy (yes or no), woman's parents owned home during infancy (yes or no), maternal history of cancer (yes or no), parental history of CVD before age 60 years (yes or no), gestational diabetes (yes or no), hypertensive disorders of pregnancy (yes or no), and time-varying pre-pregnancy smoking status (never smoker, former smoker: 1-14, ≥15 cigarettes/d, and current smoker: 1-14, 15-24, ≥25 cigarettes/d), alcohol drinking (0, 0.1-4.9, 5.0-14.9, 15.0-19.9, 20.0-29.9, or ≥30 g/d), exercise at moderate-to-high intensity (0, 0.01-1.0, 1.1-3.4, 3.5-5.9, or ≥6 h/week), and alternate healthy eating index (five categories), and body mass index (<21, 21-24.9, 25-29.9, 30-31.9, or ≥32 kg/m<sup>2</sup>). Tests for linear trends were evaluated using the Wald test on the continuous breastfeeding duration representing the median values of each category.

**Appendix Table 9. Hazard ratios (HR) (95% confidence intervals (CI)) of all-cause mortality according to lifetime total exclusive breastfeeding duration among 75,221 women from the NHS II (1989-2019).**

| Average duration of total breastfeeding (per parity) | Death cases | Crude incidence per 1000 person-years | HRs (95% CIs)                    |                                    |                                    |
|------------------------------------------------------|-------------|---------------------------------------|----------------------------------|------------------------------------|------------------------------------|
|                                                      |             |                                       | Age-adjusted models <sup>a</sup> | Multivariable model 1 <sup>b</sup> | Multivariable model 2 <sup>c</sup> |
| 0                                                    | 1300        | 1.41                                  | 1.00 [Reference]                 | 1.00 [Reference]                   | 1.00 [Reference]                   |
| 0.1-3                                                | 265         | 2.65                                  | 0.90 (0.79, 1.02)                | 0.93 (0.81, 1.06)                  | 0.97 (0.85, 1.11)                  |
| 4-6                                                  | 351         | 1.03                                  | 0.78 (0.69, 0.87)                | 0.82 (0.73, 0.92)                  | 0.91 (0.80, 1.02)                  |
| ≥7                                                   | 654         | 0.99                                  | 0.74 (0.67, 0.81)                | 0.80 (0.73, 0.88)                  | 0.92 (0.83, 1.01)                  |
| p for linear trend                                   |             |                                       | <0.0001                          | <0.0001                            | 0.060                              |

<sup>a</sup>In age-adjusted Cox proportional hazard regression models, the analyses were stratified jointly by participants' own age in years at the start of follow-up and calendar years of the current questionnaire cycle. <sup>b</sup>Multivariable Cox model 1 was further adjusted for race/ethnicity (non-Hispanic White; yes or no), age at first birth (<20, 20-24, 25-29, ≥30 years), woman's own birth weight (<5.5, 5.5-6.9, 7.0-8.4, 8.5-9.9, ≥10 lbs), oral contraceptive use during puberty (yes or no), infertility history (yes or no), woman's parents worked as professionals, managers, or executives during infancy (yes or no), woman's parents owned home during infancy (yes or no), maternal history of cancer (yes or no), and parental history of CVD before age 60 years (yes or no).

<sup>c</sup>Multivariable Cox model 2 was further adjusted for time-varying pre-pregnancy smoking status (never smoker, former smoker: 1-14, ≥15 cigarettes/d, and current smoker: 1-14, 15-24, ≥25 cigarettes/d), alcohol drinking (0, 0.1-4.9, 5.0-14.9, 15.0-19.9, 20.0-29.9, or ≥30 g/d), exercise at moderate-to-high intensity (0, 0.01-1.0, 1.1-3.4, 3.5-5.9, or ≥6 h/week), and alternate healthy eating index (five categories), and body mass index (<21, 21-24.9, 25-29.9, 30-31.9, or ≥32 kg/m<sup>2</sup>). Tests for linear trends were evaluated using the Wald test on the continuous breastfeeding duration representing the median values of each category.
